# Supplementary material for: The lncRNA PDIA3P Interacts with miR-185-5p to Modulate Oral Squamous Cell Carcinoma Progression by Targeting Cyclin D2
Source: PubMed Central journal article supplement — Mol Ther Nucleic Acids. 2017 Sep 21;9:100–10. doi: 10.1016/j.omtn.2017.08.015 (PMC5626923; doi:10.1016/j.omtn.2017.08.015), 2017-09-21
Supplement: mmc1.pdf [file mmc1.pdf]

OMTN, Volume 9

## **Supplemental Information**

### **The lncRNA PDIA3P Interacts with miR-185-5p to Modulate Oral Squamous Cell Carcinoma Progression by Targeting Cyclin D2**

**Cheng-Cao Sun, Ling Zhang, Guang Li, Shu-Jun Li, Zhen-Long Chen, Yun-Feng Fu, Feng-Yun Gong, Tao Bai, Ding-Yu Zhang, Qing-Ming Wu, and De-Jia Li**

Supplemental Figure 1

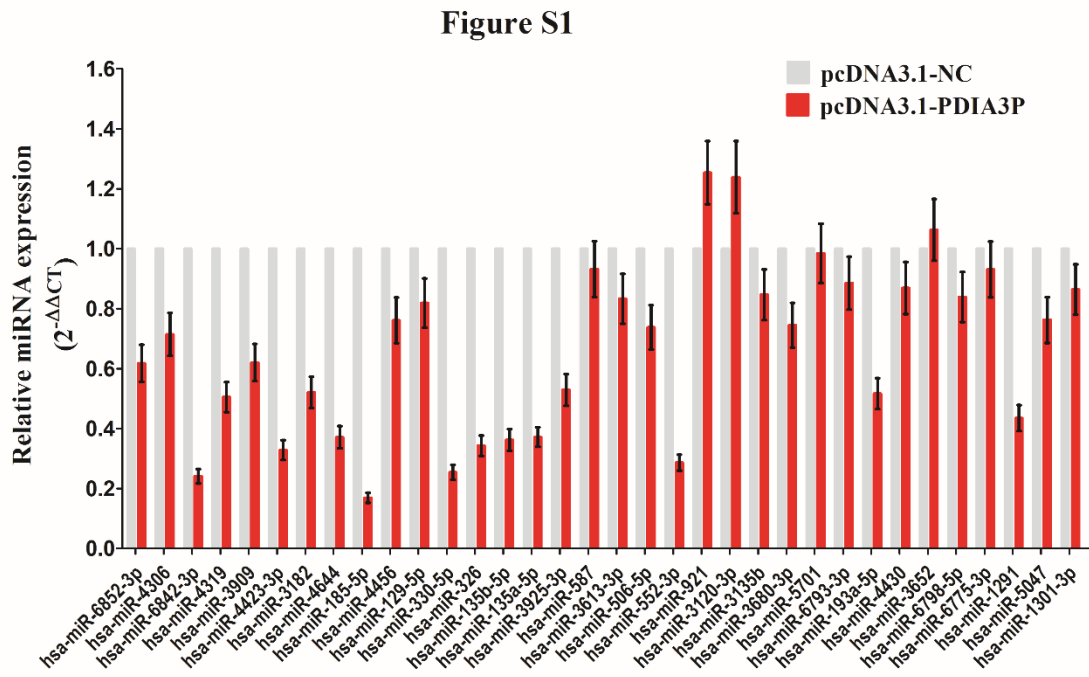

**Figure S1.** qRT-PCR was used to screen differentially expressed miRNAs (predicted by miRDB for PDIA3P) associated with PDIA3P.

**Table S1. Predicted results (PDIA3P) using miRDB (target score  $\geq 50$ )**

| Target Detail | Target Rank | Target Score | miRNA Name      | Gene Symbol |
|---------------|-------------|--------------|-----------------|-------------|
| Detail        | 1           | 97           | hsa-miR-6852-3p | submission  |
| Detail        | 2           | 91           | hsa-miR-4306    | submission  |
| Detail        | 3           | 84           | hsa-miR-6842-3p | submission  |
| Detail        | 4           | 84           | hsa-miR-4319    | submission  |
| Detail        | 5           | 84           | hsa-miR-3909    | submission  |
| Detail        | 6           | 75           | hsa-miR-4423-3p | submission  |
| Detail        | 7           | 75           | hsa-miR-3182    | submission  |
| Detail        | 8           | 73           | hsa-miR-4644    | submission  |
| Detail        | 9           | 73           | hsa-miR-185-5p  | submission  |
| Detail        | 10          | 73           | hsa-miR-4456    | submission  |
| Detail        | 11          | 69           | hsa-miR-129-5p  | submission  |
| Detail        | 12          | 67           | hsa-miR-330-5p  | submission  |
| Detail        | 13          | 67           | hsa-miR-326     | submission  |
| Detail        | 14          | 66           | hsa-miR-135b-5p | submission  |
| Detail        | 15          | 66           | hsa-miR-135a-5p | submission  |
| Detail        | 16          | 64           | hsa-miR-3925-3p | submission  |
| Detail        | 17          | 61           | hsa-miR-587     | submission  |
| Detail        | 18          | 59           | hsa-miR-3613-3p | submission  |
| Detail        | 19          | 59           | hsa-miR-506-5p  | submission  |
| Detail        | 20          | 58           | hsa-miR-552-3p  | submission  |
| Detail        | 21          | 58           | hsa-miR-921     | submission  |
| Detail        | 22          | 58           | hsa-miR-3120-3p | submission  |
| Detail        | 23          | 58           | hsa-miR-3135b   | submission  |
| Detail        | 24          | 57           | hsa-miR-3680-3p | submission  |
| Detail        | 25          | 57           | hsa-miR-5701    | submission  |
| Detail        | 26          | 56           | hsa-miR-6793-3p | submission  |
| Detail        | 27          | 53           | hsa-miR-193a-5p | submission  |
| Detail        | 28          | 52           | hsa-miR-4430    | submission  |
| Detail        | 29          | 52           | hsa-miR-3652    | submission  |
| Detail        | 30          | 52           | hsa-miR-6798-5p | submission  |
| Detail        | 31          | 52           | hsa-miR-6775-3p | submission  |
| Detail        | 32          | 52           | hsa-miR-1291    | submission  |
| Detail        | 33          | 51           | hsa-miR-5047    | submission  |
| Detail        | 34          | 51           | hsa-miR-1301-3p | submission  |

**Table S2. Primers for qRT-PCR**

| Primers for qRT-PCR            |                           |
|--------------------------------|---------------------------|
| PDIA3P-F                       | AACCACTGGGGAGGACTAGG      |
| PDIA3P-R                       | CAGTGCAGCTAAGAAATGGCT     |
| CCND2-F                        | CCGACAACCTCCATCAAGCCT     |
| CCND2-R                        | CTTAAAGTCGGTGGCACACA      |
| GAPDH-F                        | AAGACCTTGGGCTGGGACTG      |
| GAPDH-R                        | ACCAAATCCGTTGACTCCGA      |
| miR-6852-3p 3' specific primer | TGTCCTCTGTTCCCTCAG        |
| miR-4306 3' specific primer    | TGGAGAGAAAGGCAGTA         |
| miR-6842-3p 3' specific primer | TTGGCTGGTCTCTGCTCCGCAG    |
| miR-4319 3' specific primer    | TCCCTGAGCAAAGCCAC         |
| miR-3909 3' specific primer    | TGTCCTCTAGGGCCTGCAGTCT    |
| miR-4423-3p 3' specific primer | ATAGGCACCAAAAAGCAACAA     |
| miR-3182 3' specific primer    | GCTTCTGTAGTGTAGTC         |
| miR-4644 3' specific primer    | TGGAGAGAGAAAAGAGACAGAAG   |
| miR-185-5p 3' specific primer  | TGGAGAGAAAGGCAGTTCCTGA    |
| miR-4456 3' specific primer    | CCTGGTGGCTTCCTTTT         |
| miR-129-5p 3' specific primer  | CTTTTTGCGGTCTGGGCTTGC     |
| miR-330-5p 3' specific primer  | TCTCTGGGCCTGTGTCTTAGGC    |
| miR-326 3' specific primer     | CCTCTGGGCCCTTCCTCCAG      |
| miR-135b-5p 3' specific primer | TATGGCTTTTTCATTCCTATGTGA  |
| miR-135a-5p 3' specific primer | TATGGCTTTTTTATTCCTATGTGA  |
| miR-3925-3p 3' specific primer | ACTCCAGTTTTAGTTCTCTTG     |
| miR-587 3' specific primer     | TTCCATAGGTGATGAGTCAC      |
| miR-3613-3p 3' specific primer | ACAAAAAAAAAAGCCCAACCCTTC  |
| miR-506-5p 3' specific primer  | TATTCAGGAAGGTGTTACTTAA    |
| miR-552-3p 3' specific primer  | AACAGGTGACTGGTTAGACAA     |
| miR-921 3' specific primer     | CTAGTGAGGGACAGAACCAGGATTC |
| miR-3120-3p 3' specific primer | CACAGCAAGTGTAGACAGGCA     |
| miR-3135b 3' specific primer   | GGCTGGAGCGAGTGCAGTGGTG    |

---

|                                |                          |
|--------------------------------|--------------------------|
| miR-3680-3p 3' specific primer | TTTTGCATGACCCTGGGAGTAGG  |
| miR-5701 3' specific primer    | TTATTGTCACGTTCTGATT      |
| miR-6793-3p 3' specific primer | TCCCCAACCCCTGCCCGCAG     |
| miR-193a-5p 3' specific primer | TGGGTCTTTGCGGGCGAGATGA   |
| miR-4430 3' specific primer    | AGGCTGGAGTGAGCGGAG       |
| miR-3652 3' specific primer    | CGGCTGGAGGTGTGAGGA       |
| miR-6798-5p 3' specific primer | CCAGGGGGATGGGCGAGCTTGGG  |
| miR-6775-3p 3' specific primer | AGGCCCTGTCCTCTGCCCCAG    |
| miR-1291 3' specific primer    | TGGCCCTGACTGAAGACCAGCAGT |
| miR-5047 3' specific primer    | TTGCAGCTGCGGTTGTAAGGT    |
| miR-1301-3p 3' specific primer | TTGCAGCTGCCTGGGAGTGACTTC |

---

MiRNA specific 5' primer, U6-Forward and U6-Reverse were provided by the Mir-X™ miRNA First Strand Synthesis Kit

## Sequences for shRNA

### CCND2:

sh-1: top strand: 5'-  
CACCGGAACAGAAGTGCGAAGAAGACGAATCTTCTTCGCACTTCTGTTCC  
-3', bottom strand: 5'-  
AAAAGGAACAGAAGTGCGAAGAAGATTCGTCTTCTTCGCACTTCTGTTCC -  
3';

sh-2: top strand: 5'-  
CACCGCAAGCATGCTCAGACCTTCACGAATGAAGGTCTGAGCATGCTTGC  
-3', bottom strand: 5'-  
AAAAGCAAGCATGCTCAGACCTTCATTCGTGAAGGTCTGAGCATGCTTGC  
-3';

sh-3: top strand: 5'-  
CACCGCATGCTCAGACCTTCATTGCCGAAGCAATGAAGGTCTGAGCATGC  
-3', bottom strand: 5'-  
AAAAGCATGCTCAGACCTTCATTGCTTCGGCAATGAAGGTCTGAGCATGC  
-3';

### PDIA3P:

sh-1: top strand: 5'-  
CACCGGAGTCAGTGGATATCCAACCCGAAGGTTGGATATCCACTGACTCC  
-3', bottom strand: 5'-  
AAAAGGAGTCAGTGGATATCCAACCTTCGGGTTGGATATCCACTGACTCC  
-3';

sh-2: top strand: 5'-  
CACCGCAACTTGAGGGATAACTACCCGAAGGTAGTTATCCCTCAAGTTGC  
-3', bottom strand: 5'-  
AAAAGCAACTTGAGGGATAACTACCTTCGGGTAGTTATCCCTCAAGTTGC -  
3';

sh-3: top strand: 5'-  
CACCGCTCAGCAAAGACCTGAATATCGAAATATTCAGGTCTTTGCTGAGC -

3', bottom strand: 5'-  
AAAAGCTCAGCAAAGACCTGAATATTTTCGATATTCAGGTCTTTGCTGAGC -  
3'.
